# Supplementary material for: Environmental sources along natural cave ripening shape the microbiome and metabolome of artisanal blue-veined cheeses
Source: Research Square preprint supplement (doi:10.21203/rs.3.rs-1150288/v2), 2022-08-11
Supplement: Supplementary file 1 [file 01b5326c7876a3087ec8e891.xlsx]

## Sheet: bacteria_producers
	Tetragenococcus	Corynebacterium	Lactococcus	Brevibacterium	Lactobacillus	Enterococcus	Staphylococcus	Acidipropionibacterium	Brachybacterium	Alkalibacterium	Bifidobacterium	Acetobacter	Hafnia	Leuconostoc	Yaniella	Obesumbacterium	Pseudoruegeria	Streptomyces	Streptococcus	Enterobacter	Actinomyces	Bacillus	Propionibacterium	Lelliottia	Pseudomonas	Kluyvera	Microbacterium	Acinetobacter	Arthrobacter	Chryseobacterium	Marinilactibacillus	Mycobacterium	Carnobacterium	Halomonas	Rhodococcus	Aerococcus	Glutamicibacter
Producer_1_core	10.6673	10.4876	64.2615	1.4437	8.23766	1.1374	0.20504	0	0.429913	0.543817	0.00958361	0	0	0.323551	0.368075	0	0.0440554	0.145466	0.299282	0.00958361	0.010203	0.112104	0	0	0.0299897	0	0.0452943	0.00958361	0.0503958	0.00958361	0.0540746	0.0452943	0.038862	0.0395733	0.0401927	0.0337604	0.0503958
Producer_1_rind	20.8487	25.5958	10.7815	28.9673	0.366289	0.387021	0.527333	0.0097529	4.80394	3.01893	0.0192156	0	0	0.0425595	0.35392	0	0.022555	0.489935	0.10917	0.00462706	0.0384313	0.144262	0.0097529	0	0.0537837	0	0.193526	0.00896395	0.169973	0.00896395	0.17373	0.139136	0.0576469	0.132428	0.125047	0.0655317	0.100705
Producer_2_core	6.92208	26.0744	24.0786	1.66682	11.7071	8.64139	0.401983	6.39308	0.213634	0.0193821	2.66928	0.00473552	4.19168	0.890826	0.298805	1.38202	0.0224534	0.202343	0.145535	0.396024	0.630295	0.0659532	0.695901	0.00997991	0.259729	0	0.104209	0.0241177	0.0823329	0.0199598	0.00415783	0.0429909	0.171248	0.00997991	0.0388331	0.00415783	0.0283443
Producer_2_rind	47.7979	42.5469	0.569918	4.98583	0.37968	0.338974	0.897307	0.00424412	0.281384	0.113029	0.250442	0	0.00471809	0.0621025	0.420869	0.00471809	0.0330267	0.109418	0.0487372	0.00471809	0.0176079	0.0932302	0	0	0.0188724	0	0.03946	0.00471809	0.0528238	0.00471809	0.0570664	0.0304978	0.0353734	0	0.0304978	0.0804994	0.0440191
Producer_3_core	31.2182	12.7576	19.719	0.306493	16.6101	1.4538	0.698652	0.159817	0.357686	0.00761035	2.56578	4.78978	0	2.04036	0	0	1.24074	0.310554	0.338099	0.403057	0.0304414	0.15283	0.0152207	0.702466	0.217151	0.565577	0.157003	0.468098	0.0719307	0.428049	0	0.079541	0.00761035	0.0401307	0.079541	0.00761035	0
Producer_3_rind	83.9574	3.97173	0.156975	1.06163	0.28963	0.368804	4.44916	0	0.04383	2.05673	0.088492	0	0	0.12651	1.37116	0	0	0.0786787	0.0751267	0.00873349	0.00969697	0.167775	0	0.003885	0.0457028	0.00782418	0.0272181	0.0175212	0.0863634	0.0126727	0.0869442	0.0193939	0.0410479	0.116557	0.0193939	0.127884	0.0775758
Kruskal p-value	0.0326872	0.127084	0.008335	0.0464062	0.0113553	0.0120293	0.0244998	0.0400126	0.156026	0.00812029	0.00841629	0.0133284	0.0133284	0.00679416	0.259315	0.0133284	0.0724998	0.059062	0.0329905	0.0312986	0.0946307	0.211247	0.0248095	0.0203152	0.123307	0.011476	0.0458811	0.0898621	0.522193	0.120075	0.0139416	0.0936779	0.0226071	0.201461	0.100411	0.00948015	0.153117
core_prod1 core_prod2 p.ttest	0.775277	0.43158	0.0017087	0.976415	0.133668	0.00545254	0.817592	1.55e-05	0.964369	0.758219	0.0113049	1	0.00181329	0.00336391	0.986527	0.00088182	0.999716	0.739355	0.295453	0.0931612	4.32e-05	0.609942	0.000115758	1	0.0628795	1	0.42021	0.996486	0.971886	0.995646	0.339021	0.94844	0.000103967	0.867685	0.968088	0.0976001	0.799985
core_prod2 core_prod3 p.ttest	0.13757	0.455215	0.6683	0.976415	0.0407566	0.00595452	0.817592	1.58e-05	0.964369	0.989377	0.989422	0.109229	0.00181329	1.2e-05	0.986527	0.00088182	0.00322791	0.570581	0.186368	0.999598	4.32e-05	0.463088	0.000115758	0.0268026	0.915601	0.0256757	0.451092	0.0219918	0.971886	0.0096303	0.943259	0.575988	4.27e-05	0.867685	0.433402	0.826021	0.799985
core_prod1 core_prod3 p.ttest	0.202622	0.923199	0.000912554	0.976415	0.00261454	0.992209	0.734505	1	0.964369	0.758219	0.0113049	0.109229	1	2.03e-07	0.986527	1	0.00322791	0.35618	0.797472	0.0931612	0.995324	0.638727	1	0.0268026	0.0689315	0.0256757	0.132889	0.0219918	0.971886	0.0096303	0.334421	0.575988	0.267163	0.994071	0.433402	0.132188	0.799985
rind_prod1 rind_prod2 p.ttest	0.107688	0.43158	0.326409	0.0210855	0.994744	0.992209	0.817592	1	0.0367822	0.0285852	0.989422	1	1	0.894692	0.986527	1	0.999716	0.0569884	0.769781	0.999598	0.995324	0.597643	1	1	0.915601	1	0.0736958	0.996486	0.716946	0.995646	0.0564848	0.0671049	0.427755	0.582192	0.0956213	0.374239	0.799985
rind_prod2 rind_prod3 p.ttest	0.0331793	0.158269	0.962748	0.976415	0.994744	0.992209	0.00010309	1	0.964369	0.0951803	0.989422	1	1	0.711242	0.808746	1	0.999716	0.800252	0.800225	0.999598	0.995324	0.463088	1	1	0.915601	1	0.876597	0.996486	0.971886	0.995646	0.556009	0.809693	0.90058	0.582192	0.864106	0.0153703	0.799985
rind_prod1 rind_prod3 p.ttest	0.00176824	0.346898	0.326409	0.0115208	0.994744	0.992209	6.6e-05	1	0.0367822	0.480412	0.989422	1	1	0.660145	0.808746	1	0.999716	0.0569884	0.797472	0.999598	0.995324	0.763524	1	1	0.915601	1	0.0736958	0.996486	0.716946	0.995646	0.141775	0.0671049	0.525932	0.958061	0.0956213	0.00381779	0.799985
core_prod1 rind_prod1 p.ttest	0.474356	0.43158	0.000237682	0.0115208	0.00290746	0.938916	0.817592	1	0.0367822	0.0539841	0.989422	1	1	0.113576	0.986527	1	0.999716	0.0667519	0.186368	0.999598	0.995324	0.732727	1	1	0.915601	1	0.0736958	0.996486	0.716946	0.995646	0.0564848	0.073731	0.496432	0.582192	0.0956213	0.0831331	0.799985
core_prod2 rind_prod2 p.ttest	0.0234624	0.43158	0.0402476	0.976415	0.000251905	0.00352305	0.734505	1.55e-05	0.964369	0.981069	0.0113049	1	0.00181329	0.000201559	0.986527	0.00088182	0.999716	0.612733	0.602196	0.0931612	4.32e-05	0.757752	0.000115758	1	0.0628795	1	0.39599	0.996486	0.971886	0.995646	0.334421	0.809693	0.000103967	0.958061	0.864106	0.00122441	0.834512
core_prod3 rind_prod3 p.ttest	0.00540608	0.629813	0.0785905	0.976415	1.55e-05	0.938916	7.66e-05	1	0.964369	0.0913035	0.0113049	0.109229	1	8.02e-08	0.808746	1	0.00322791	0.224217	0.145004	0.0931612	0.995324	0.798787	1	0.0268026	0.0867193	0.0256757	0.106308	0.0219918	0.971886	0.0096303	0.141775	0.283162	0.25479	0.597523	0.287639	3.53e-05	0.799985

## Sheet: fungi_producers
	Sum 5 genera	Penicillium	Debaryomyces	Geotrichum	Kluyveromyces	Scheffersomyces	Pichia	Candida	Fusarium	Colletotrichum	Acremonium	Pyricularia	Thermothielavioides	Thermothelomyces	Diutina	Sugiyamaella	Neurospora	Clavispora	Tetrapisispora	Pochonia	Aspergillus	Zymoseptoria	Cercospora	Cutaneotrichosporon	Zygosaccharomyces	Schizosaccharomyces	Torulaspora	Nakaseomyces	Malassezia	Yarrowia	Eremothecium	Naumovozyma	Saccharomyces	Kazachstania
Producer_1_core	98.1716	91.9283	1.07953	2.12808	3.01149	0.0241631	1.68167	0.112707	0	0	0	0	0	0	0.00843241	0	0	0.0256213	0	0	0	0	0	0	0	0	0	0	0	0	0	0	0	0
Producer_1_rind	99.5932	80.2657	18.7267	0	0.0776096	0.523226	0	0.0666755	0	0	0	0.340136	0	0	0	0	0	0	0	0	0	0	0	0	0	0	0	0	0	0	0	0	0	0
Producer_2_core	98.4282	29.0486	0.168307	66.8429	2.36842	0	0.366235	0.108297	0.0358334	0	0.0140469	0	0	0	0.122344	0.308615	0	0.230641	0.222104	0	0	0.0358334	0	0	0.0498803	0.0498803	0	0.0140469	0.0140469	0	0	0	0	0
Producer_2_rind	99.5781	96.4966	2.65963	0	0.32511	0.0967077	0	0.122076	0.0217723	0.0749355	0.0217723	0.0217723	0.0217723	0	0.0689124	0.0217723	0	0	0	0	0.0471401	0	0	0	0	0	0	0	0	0	0	0	0	0
Producer_3_core	99.5131	95.6808	0.0150185	1.98845	1.82884	0	0.30689	0.0588025	0.00812436	0	0	0	0	0	0.0152757	0.0123151	0	0.00419076	0.0123151	0	0.00812436	0	0	0	0.00419076	0	0.0275908	0.00419076	0	0.00812436	0.00419076	0.00419076	0.00419076	0.00419076
Producer_3_rind	93.7661	1.50408	88.3243	0.0586854	0.0586854	3.82034	0.0586854	0.748311	1.10042	0.955496	0.838125	0.438355	0.720754	0.438355	0.203613	0	0.320984	0	0	0.176056	0.0586854	0.0586854	0.0586854	0.0586854	0	0	0	0	0	0	0	0	0	0
Kruskal p-value		0.0206898	0.00927268	0.00747045	0.0219318	0.0139691	0.00895057	0.10539	0.0388176	0.011476	0.0268462	0.301141	0.0133284	0.0601837	0.131502	0.0248095	0.0601837	0.0268462	0.011476	0.41588	0.226524	0.191732	0.41588	0.41588	0.135043	0.0601837	0.00482615	0.51333	0.41588	0.0601837	0.41588	0.41588	0.41588	0.41588
core_prod1 core_prod2 p.ttest		0.000190772	0.920894	3.80562e-05	0.897896	0.960976	0.00695783	0.942256	1	1	1	1	1	1	0.400431	1.3966e-06	1	1.88616e-07	8.20887e-05	1	1	0.627172	1	1	0.0221128	0.0162869	1	0.460683	0.326593	1	1	1	1	1
core_prod2 core_prod3 p.ttest		0.000130863	0.97623	3.80562e-05	0.897896	1	0.928461	0.679718	1	1	1	1	1	1	0.400431	1.62674e-06	1	7.75701e-08	0.000113146	1	1	0.627172	1	1	0.0297712	0.0162869	0.0043601	0.80045	0.326593	0.01418	0.326593	0.326593	0.326593	0.326593
core_prod1 core_prod3 p.ttest		0.789237	0.920894	1	0.650976	0.960976	0.00635673	0.679718	1	1	1	1	1	1	0.930181	0.941233	1	0.406732	1	1	1	1	1	1	1	1	0.0043601	1	1	0.01418	0.326593	0.326593	0.326593	0.326593
rind_prod1 rind_prod2 p.ttest		0.243446	0.0129867	1	0.930318	0.0627684	1	0.679718	1	1	1	0.41063	1	1	0.622649	0.907891	1	1	1	1	0.476611	1	1	1	1	1	1	1	1	1	1	1	1	1
rind_prod2 rind_prod3 p.ttest		1.27239e-05	3.45128e-09	1	0.930318	4.16552e-10	0.928461	6.309e-07	0.000419872	0.00891197	0.00129266	0.409373	7.22527e-05	0.0339644	0.388667	0.907891	0.0153418	1	1	0.326593	1	0.470711	0.326593	0.326593	1	1	1	1	1	1	1	1	1	1
rind_prod1 rind_prod3 p.ttest		3.93561e-05	2.98105e-08	1	0.989878	1.37445e-09	0.928461	6.21536e-07	0.000419872	0.00628487	0.00129266	1	6.7144e-05	0.0339644	0.14952	1	0.0153418	1	1	0.326593	0.476611	0.470711	0.326593	0.326593	1	1	1	1	1	1	1	1	1	1
core_prod1 rind_prod1 p.ttest		0.382144	0.00817882	1	0.428569	0.0340429	0.0023709	0.679718	1	1	1	0.409373	1	1	0.930181	1	1	0.316335	1	1	1	1	1	1	1	1	1	1	1	1	1	1	1	1
core_prod2 rind_prod2 p.ttest		0.000130863	0.858969	3.80562e-05	0.468102	0.826385	0.580509	0.942256	1	1	1	1	1	1	0.622649	1.84319e-06	1	7.75701e-08	8.20887e-05	1	0.476611	0.627172	1	1	0.0221128	0.0162869	1	0.460683	0.326593	1	1	1	1	1
core_prod3 rind_prod3 p.ttest		1.27239e-05	3.45128e-09	1	0.47585	4.16552e-10	0.65692	6.21536e-07	0.000419872	0.00628487	0.00129266	0.409373	6.7144e-05	0.0339644	0.14952	0.941233	0.0153418	1	1	0.326593	0.476611	0.470711	0.326593	0.326593	1	1	0.0043601	1	1	0.01418	0.326593	0.326593	0.326593	0.326593

## Sheet: amines_producers
	Agmatine	Histamine	Tyramine	Putrescine	Tryptamine	Cadaverine	Phenylethylamine	Total Amines
Producer_1_core	156.23	51.1267	697.33	7.93667	30.9767	899.183	39.18	1881.96
Producer_1_rind	99.81	36.31	619.137	6.46333	101.467	2266.35	0	3129.54
Producer_2_core	355.86	615.77	4138.69	40.55	1297.75	758.86	130.473	7337.95
Producer_2_rind	425.297	474.61	2721.17	47.3067	563.427	610.697	83.61	4926.12
Producer_3_core	243.023	120.783	2924.65	91.9733	1143.94	705.723	86.8467	5316.95
Producer_3_rind	173.59	123.377	1407.91	182.177	89.72	1112.06	43.6267	3132.46
Kruskal p-value	0.03581	0.00701623	0.00692805	0.00627445	0.00657101	0.0279194	0.00737515	0.00640744
core_prod1 core_prod2 p.ttest	0.0546721	2.52e-16	9.82e-12	0.000265647	3.44e-12	0.353031	2.93e-07	2.64e-10
core_prod2 core_prod3 p.ttest	0.247652	6.49e-16	2.91e-07	5.72e-06	0.00206495	0.692657	0.000131164	2.23e-06
core_prod1 core_prod3 p.ttest	0.387024	1.44e-06	6.56e-10	3.16e-08	6.07e-12	0.22658	9.76e-05	1.43e-08
rind_prod1 rind_prod2 p.ttest	0.0118272	2.09e-15	1.07e-09	4.51e-05	5.89e-08	3.93e-07	3.57e-07	6.27e-06
rind_prod2 rind_prod3 p.ttest	0.0182277	1.84e-14	1.35e-07	2.36e-10	4.9e-08	0.00609186	0.000238974	6.27e-06
rind_prod1 rind_prod3 p.ttest	0.416393	1.69e-07	2.33e-05	2.31e-11	0.763196	4.22e-06	0.000131164	0.990033
core_prod1 rind_prod1 p.ttest	0.487605	0.0887348	0.512109	0.819002	0.102854	8.61e-07	0.000262644	0.000168837
core_prod2 rind_prod2 p.ttest	0.416393	7.78e-10	6.42e-08	0.326265	4.62e-10	0.351167	9.81e-05	5.02e-07
core_prod3 rind_prod3 p.ttest	0.416393	0.746201	3.38e-08	1.98e-08	8.78e-12	0.0198224	0.000131164	1.1e-06

## Sheet: volatiles_producers
	2-Propanol	2-Butanone	Acetic acid	3-Methyl butanal	2-Pentanone	Methyl butanoate	Acetoin	Propanoic acid	Toluene	Ethyl butanoate	2-Hexanone	2-Methyl propanoic acid	Butanoic acid	Isopentyl acetate	3-Methyl butanoic acid	Propyl butanoate	2-Methyl butanoic acid	2-Heptanone	2-Heptanol	Methyl hexanoate	Pentanoic acid	Ethyl hexanoate	2-Octanone	Trimethylpyrazine	2-Pentylbutyrate	Hexanoic acid	8-Nonen-2-one	2-Nonanone	2-Nonanol	Methyl octanoate	Hexalactone	Ethyl octanoate	Octanoic acid	Isopropyl octanoate	Isoamyll hexanoate	2-Undecanone	Methyl decanoate	Ethyl decanoate	Decanoic acid	Isopentyl octanoate	Isobutyl decanoate	Ethyl dodecanoate
Producer_1_core	0	0	3.20468e+06	0	3.74468e+06	59571.5	0	121193	307871	5436396	197057	965480	7.74228e+06	0	5.37827e+06	284645	2.58058e+06	1.00329e+07	80248.7	322635	922554	1.11193e+07	213814	0	280755	9.37654e+06	0	2.40723e+06	0	64138	131530	1.16325e+06	2.55026e+06	11792.8	137178	199756	13536.5	330370	42451.3	17798.7	0	17660.3
Producer_1_rind	879081	105908	2.12052e+06	0	3.26961e+06	42349.7	0	99780.8	129718	4.07649e+06	159376	1082294	5921194	0	6505895	209732	3.34844e+06	8.80637e+06	0	216420	616410	5.97949e+06	143759	5949	108100	7.98535e+06	43448.2	1874833	0	32050.8	73415.2	682945	1573102	4885.33	44514.2	140607	0	193881	0	8435	0	11179.2
Producer_2_core	195215	0	1.79373e+06	70072.8	1.41428e+06	140121	0	729235	180375	10399075	18420.8	194836	6.5185e+06	0	2.14382e+06	1.58548e+06	1.17102e+06	9.39043e+06	840562	890885	405887	21890922	216248	40744.7	526695	8.59247e+06	0	4852129	156862	233475	168622	5.03474e+06	2.96405e+06	20793.2	350064	362237	46606.7	1.07699e+06	114851	47952.2	19426.8	47827.5
Producer_2_rind	0	0	3336922	0	1.83136e+06	18285.5	283592	386447	99831	7.72116e+06	0	313862	5.72159e+06	0	3649452	901112	1.97841e+06	1.08808e+07	1.52021e+06	243142	414486	2.00351e+07	392329	122496	594628	8.78164e+06	0	1.46642e+07	581683	96177.8	236431	5.7146e+06	3.34656e+06	37114.5	533678	2.12121e+06	41169.2	1774009	511461	97508.7	23898.7	124960
Producer_3_core	1.26095e+06	239271	2.55499e+06	0	1.36659e+07	80448.7	0	34674.5	115349	3.56465e+06	405274	0	2492310	179131	1283475	291971	1.06337e+06	2.72874e+07	2.65512e+07	240496	0	6.7978e+06	892021	46836.5	1.66628e+06	3239673	5.35068e+06	2.26655e+07	3.55301e+06	104125	660575	1.87196e+06	633738	97394.5	1091179	5.20392e+06	41311.8	664402	12894.3	205694	10551.3	60942.5
Producer_3_rind	1.28463e+06	159803	1.84727e+06	0	9682697	98927.7	327000	17975.5	121396	4.43061e+06	291932	192860	2.70445e+06	110139	1.59036e+06	696461	1492924	2.4423e+07	1.11456e+07	205710	0	5441381	714832	223607	2496590	4.27603e+06	2.85648e+06	2.14273e+07	2640202	120878	493070	1.64491e+06	1.25383e+06	139619	1412464	4.82542e+06	51267.5	831446	174259	251528	12397.2	95104.8
Kruskal p-value	0.0299093	0.00497878	0.0326872	0.00482615	0.00734532	0.00771164	0.00547069	0.0063629	0.0320883	0.0138881	0.00706095	0.00819481	0.00954571	0.00489334	0.00581007	0.0177869	0.0053716	0.0133669	0.00639103	0.0315	0.00623434	0.0147069	0.00866479	0.00648008	0.00692805	0.0147069	0.0290766	0.00817472	0.00551852	0.0104124	0.00616163	0.011465	0.0126204	0.0066628	0.0053716	0.0065339	0.0253723	0.00734532	0.00725721	0.00581007	0.00870148	0.00720358
core_prod1 core_prod2 p.ttest	0.724822	1	0.0104551	1.98e-12	0.0226973	0.000412729	1	2.41e-10	0.0221735	0.000522219	3.8e-05	4.53e-08	0.0176135	1	3.14e-07	4.66e-05	9.81e-07	0.641503	0.24509	9.77e-06	8.89e-06	6.68e-05	0.98411	0.389343	0.553474	0.0940853	1	0.289598	0.726851	1.23e-05	0.651625	2.24e-05	0.271409	0.738488	0.00329151	0.873298	0.000481094	0.00419056	0.576347	0.114291	0.000287786	0.0640431
core_prod2 core_prod3 p.ttest	0.0471087	3.77e-09	0.107669	1.98e-12	4.72e-08	0.0032276	1	1.01e-10	0.271609	0.000100729	3.87e-08	0.00961471	2.79e-06	2.14e-06	0.0145892	4.66e-05	0.4561	3.86e-08	5.35e-14	3.1e-06	4.91e-05	5.2e-06	0.000539833	0.879953	0.0117106	7.66e-08	0.00173586	4.26e-06	4.37e-06	9.21e-05	0.000250672	0.00010938	0.000102002	0.00962071	4.23e-08	5.66e-05	0.477523	0.0626783	0.397606	2.39e-06	0.0273797	0.396419
core_prod1 core_prod3 p.ttest	0.0280861	3.77e-09	0.147235	1	1.72e-07	0.196056	1	0.0139874	0.00254681	0.091148	1.1e-05	1.18e-08	3.6e-07	2.14e-06	3.37e-08	0.967644	5.5e-07	3.9e-08	5.35e-14	0.464251	3.95e-08	0.0321778	0.000539833	0.371793	0.00361667	4.85e-08	0.00173586	2.64e-06	4.05e-06	0.0947604	0.000189194	0.273069	0.000323601	0.00530876	3.32e-09	5.66e-05	0.00157345	0.120888	0.793427	4.34e-07	0.0117787	0.0160772
rind_prod1 rind_prod2 p.ttest	0.0842977	8.81e-06	0.0171037	1	0.12237	0.147708	1.24e-10	6.19e-07	0.697923	0.00417814	9.93e-05	4.53e-08	0.642799	1	1.04e-06	0.00557884	1.11e-06	0.173358	0.0327564	0.850377	0.00886018	6.59e-06	0.0999428	0.0265338	0.261845	0.0940853	1	8.34e-05	0.192341	0.0122642	0.0968457	8.23e-06	0.000515562	0.252119	3.04e-06	0.0216271	9.77e-05	2.93e-05	0.00072408	0.000400203	8e-05	4.62e-05
rind_prod2 rind_prod3 p.ttest	0.0280861	1.84e-07	0.0104551	1	1.49e-06	0.000412729	0.0113075	6.18e-08	0.813122	0.00728919	6.08e-07	0.0783296	2.06e-05	0.000138284	2.36e-05	0.337229	0.00575453	2.21e-07	1.92e-09	0.850377	4.91e-05	5.56e-06	0.0365784	0.0477733	0.000407587	2.62e-07	0.0501037	0.00808002	0.000225999	0.265411	0.0142146	1.89e-05	0.000191436	0.00204499	7.11e-09	0.00343012	0.18745	0.00100703	0.00672612	2.63e-06	0.00865935	0.0640431
rind_prod1 rind_prod3 p.ttest	0.477473	0.00265499	0.53685	1	1.05e-05	0.00407755	4.64e-11	0.0174424	0.881271	0.702295	0.000412388	1.55e-08	1.24e-05	0.000138284	8.31e-09	0.0292425	7.79e-08	7.23e-08	4.9e-10	0.943929	1.75e-06	0.752492	0.00170747	0.000811381	0.000191112	1.62e-06	0.0501037	2.64e-06	2.9e-05	0.00167173	0.000624782	0.136505	0.353944	0.0006174	2.47e-10	5.66e-05	4.4e-05	0.00918764	0.1722	9.51e-08	0.00602703	0.000330329
core_prod1 rind_prod1 p.ttest	0.0842977	8.81e-06	0.0280586	1	0.615488	0.2516	1	0.49952	0.0027458	0.216251	0.192434	0.0783296	0.00144124	1	0.00295104	0.727934	0.000206578	0.419545	0.891746	0.332759	0.000546114	0.014251	0.609848	0.879953	0.661978	0.00793062	1	0.79727	1	0.158566	0.51652	0.403891	0.020194	0.7586	0.130043	0.93208	0.0855652	0.475697	0.732916	0.597999	1	0.653534
core_prod2 rind_prod2 p.ttest	0.724822	1	0.0104551	1.98e-12	0.621494	2.94e-05	1.24e-10	9.91e-08	0.162109	0.022329	0.499265	0.0783296	0.102261	1	0.000342708	0.00557884	0.0001466	0.335921	0.280593	3.1e-06	0.957827	0.359448	0.208734	0.104107	0.843677	0.646891	1	0.000674167	0.340252	6.88e-05	0.477528	0.273069	0.289781	0.557168	0.0078704	0.032367	0.477523	0.00582916	0.00250811	0.0193411	0.233095	0.000423492
core_prod3 rind_prod3 p.ttest	1	0.0001259	0.124141	1	0.000675307	0.23628	4.64e-11	0.568135	0.881271	0.412247	0.00132049	0.00961471	0.642799	0.00516201	0.316834	0.0561396	0.0111483	0.0620406	1.41e-11	0.850377	1	0.498278	0.208734	0.00235391	0.049795	0.0365488	0.0749647	0.592171	0.048899	0.436986	0.0968457	0.672191	0.107063	0.131109	0.000149707	0.734755	0.18745	0.412765	0.190794	0.0264207	0.62966	0.0435713
