# Supplementary material for: Environmental sources along natural cave ripening shape the microbiome and metabolome of artisanal blue-veined cheeses
Source: Research Square preprint supplement (doi:10.21203/rs.3.rs-1150288/v2), 2022-08-11
Supplement: Supplementary file 3 [file 3410c7cfded1a797c54b3c29.xlsx]

## Sheet: heads
Taxonomy	TaxID	File	Seqs_name
[Candida] intermedia strain CBS 141442	kraken:taxid|45354	GCA_900106115.1_CBS_141442_assembly_genomic.fna	LT635756.1
Acremonium chrysogenum ATCC 11550	kraken:taxid|857340	GCA_000769265.1_ASM76926v1_genomic.fna	JPKY01000001.1
Acremonium furcatum	kraken:taxid|45276	GCA_001599815.1_JCM_9210_assembly_v001_genomic.fna	BCIA01000001.1
Cutaneotrichosporon curvatum strain ATCC 20509	kraken:taxid|57679	GCA_001712445.1_ASM171244v1_genomic.fna	MATS01000140.1
Diutina rugosa strain CBS 613	kraken:taxid|5481	GCA_008704595.1_ASM870459v1_genomic.fna	SWFT01000014.1
Galactomyces candidum	kraken:taxid|1173061	CCBN01.1.fsa_genomic.fna	CCBN010000001.1
Geotrichum fermentans strain CICC 1368	kraken:taxid|44066	GCA_002233575.1_ASM223357v1_genomic.fna	LFTX01000541.1
Penicillium camemberti str. FM013	kraken:taxid|1429867	GCA_000513335.1_PCAMFM013_20131106_genomic.fna	HG793134.1
Penicillium capsulatum strain LiaoWQ-2011	kraken:taxid|69766	GCA_000943775.1_ASM94377v1_genomic.fna	JPLR01000004.1
Penicillium chrysogenum strain P2niaD18	kraken:taxid|5076	GCA_000710275.1_ASM71027v1_genomic.fna	CM002798.1
Penicillium roqueforti FM164	kraken:taxid|1365484	GCA_000513255.1_PROQFM164_20130607_genomic.fna	HG792029.1
Penicillium verrucosum strain BFE808	kraken:taxid|60171	GCA_000970515.2_PV808_April18ReSeqReAss_genomic.fna	LAKW02000001.1
Pichia fermentans strain fo/MP/02	kraken:taxid|53655	GCA_003339355.1_UCD_Pferm_PL1_genomic.fna	QAWB01000001.1
Pichia kudriavzevii	kraken:taxid|4909	GCF_003054445.1_ASM305444v1_genomic.fna	NC_042506.1
Pichia membranifaciens NRRL Y-2026	kraken:taxid|763406	GCF_001661235.1_Picme2_genomic.fna	NW_017566982.1
Pichia terricola strain NRRL YB-4310	kraken:taxid|54551	GCA_003706875.2_ASM370687v2_genomic.fna	PPMO02000100.1
Sporidiobolus salmonicolor	kraken:taxid|379960	CENE01.1.fsa_genomic.fna	gi|814543669|emb|CENE01000001.1|
Thermothielavioides terrestris NRRL 8126	kraken:taxid|578455	GCF_000226115.1_ASM22611v1_genomic.fna	NC_016457.1
Zygosaccharomyces bailii	kraken:taxid|4954	GCA_000442885.1_ZYBA0_genomic.fna	HG316454.1
Zygosaccharomyces rouxii strain CBS732	kraken:taxid|559307	GCF_000026365.1_ASM2636v1_genomic.fna	NC_012990.1
