# Supplementary material for: Environmental sources along natural cave ripening shape the microbiome and metabolome of artisanal blue-veined cheeses
Source: Research Square preprint supplement (doi:10.21203/rs.3.rs-1150288/v2), 2022-08-11
Supplement: Supplementary file 4 [file 528bb3284786bc86c32476a2.xlsx]

## Sheet: bacteria_caves
	Tetragenococcus	Lactococcus	Corynebacterium	Lactobacillus	Enterococcus	Staphylococcus	Acidipropionibacterium	Bifidobacterium	Hafnia	Brevibacterium	Obesumbacterium	Leuconostoc	Propionibacterium	Actinomyces	Enterobacter	Yaniella	Streptococcus	Pseudomonas	Carnobacterium	Bacillus	Brachybacterium	Lentibacillus	Streptomyces	Klebsiella	Pseudoruegeria	Microbacterium
Cave_1_core	4.67127	47.5913	3.18182	16.6305	11.1632	0.482066	5.1028	2.67576	3.27968	0.0851855	1.16563	1.15938	0.227544	0.402616	0.402809	0.0585941	0.246515	0.0381243	0.196338	0.090407	0.0289419	0.0224104	0.0802391	0.0999985	0.00423603	0.0567085
Cave_1_rind	83.4142	1.30376	1.41588	0.533966	0.610341	7.13806	0.0188301	0.538614	0.0443914	2.88128	0.0343309	0.109963	0	0.00438481	0.0144453	0.354009	0.067255	0.0515189	0.0484249	0.133219	0.113567	0.0967322	0.0522231	0.00935623	0.0750434	0.0239192
Cave_2_core	6.92208	24.0786	26.0744	11.7071	8.64139	0.401983	6.39308	2.66928	4.19168	1.66682	1.38202	0.890826	0.695901	0.630295	0.396024	0.298805	0.145535	0.259729	0.171248	0.0659532	0.213634	0.0349269	0.202343	0.0970483	0.0224534	0.104209
Cave_2_rind	47.7979	0.569918	42.5469	0.37968	0.338974	0.897307	0.00424412	0.250442	0.00471809	4.98583	0.00471809	0.0621025	0	0.0176079	0.00471809	0.420869	0.0487372	0.0188724	0.0353734	0.0932302	0.281384	0.111786	0.109418	0.00471809	0.0330267	0.03946
Cave_3_core	3.59631	31.0998	2.55303	21.406	11.8592	0.526349	7.53409	6.4448	6.58479	0.0379209	2.11673	1.39566	0.989511	0.65983	0.785719	0	0.165422	0.39157	0.139554	0.0549981	0.0251628	0.0254654	0.105222	0.195685	0	0.0798328
Cave_3_rind	67.0936	4.60002	2.54249	1.7116	1.61143	15.9204	0.0193258	1.93876	0.064548	1.32807	0.0386515	0.504559	0	0.00657073	0.0320808	0.0316943	0.235448	0.0320808	0.183268	0.334054	0.0506337	0.340617	0.0382651	0.00657073	0.191712	0.012755
Kruskal p-value	0.0129885	0.00892042	0.0415982	0.00727411	0.0104124	0.0231605	0.0582958	0.0832778	0.0618223	0.03992	0.0596292	0.019924	0.0128855	0.054194	0.0701068	0.0192033	0.0090949	0.0442232	0.0210832	0.0110322	0.0613688	0.0133669	0.0710727	0.0477824	0.129997	0.06417
core_cave1 core_cave2 p.ttest	0.835548	0.00657195	0.0250937	0.0263479	0.483816	0.992771	0.739912	0.996495	0.78963	0.365212	0.889136	0.355198	0.119585	0.474209	0.979934	0.135362	0.0679307	0.0216659	0.658525	0.338211	0.221967	0.854254	0.118754	0.966445	0.896894	0.219131
core_cave2 core_cave3 p.ttest	0.784839	0.375855	0.0247364	0.000274239	0.364409	0.992771	0.739912	0.0686721	0.301573	0.365212	0.303289	0.114023	0.374533	0.992668	0.263937	0.0799562	0.707208	0.157979	0.5814	0.676291	0.221967	0.85929	0.217278	0.0866666	0.896894	0.478962
core_cave1 core_cave3 p.ttest	0.893664	0.0353385	0.998957	0.0280551	0.851805	0.992771	0.395047	0.0686721	0.162783	0.970838	0.182414	0.393459	0.0222662	0.436871	0.263937	0.77254	0.107623	0.00195	0.276529	0.187298	0.968714	0.93539	0.699374	0.0866666	0.947479	0.478962
rind_cave1 rind_cave2 p.ttest	0.00104593	0.911862	0.00119392	0.933974	0.91922	0.361361	0.999813	0.905672	0.991505	0.262232	0.994086	0.852639	1	0.992668	0.979934	0.77254	0.707208	0.920191	0.760201	0.162271	0.23513	0.854254	0.466444	0.966445	0.862129	0.593888
rind_cave2 rind_cave3 p.ttest	0.0416568	0.630371	0.00119392	0.552922	0.794947	0.0321047	0.999813	0.398127	0.991505	0.0680389	0.994086	0.157189	1	0.992668	0.979934	0.0595651	0.00459754	0.920191	0.0117177	5.65e-07	0.154281	0.000137477	0.388551	0.966445	0.100952	0.474678
rind_cave1 rind_cave3 p.ttest	0.0754698	0.665152	0.998957	0.568503	0.818169	0.274428	0.999813	0.479687	0.991505	0.365212	0.994086	0.189368	1	0.992668	0.979934	0.075803	0.00556169	0.920191	0.0130723	3.2e-06	0.646801	9.4e-05	0.827593	0.966445	0.266057	0.669856
core_cave1 rind_cave1 p.ttest	2.44e-06	8.97e-05	0.998957	4.07e-06	0.00620271	0.36079	0.0506545	0.27693	0.162783	0.118576	0.119776	0.00494571	0.425962	0.207235	0.263937	0.0799562	0.00459754	0.920191	0.0117177	0.146748	0.581199	0.111671	0.699374	0.0866666	0.606109	0.372555
core_cave2 rind_cave2 p.ttest	0.000374909	0.00657195	0.0984853	9.61e-05	0.0173317	0.992771	0.0240064	0.257238	0.114899	0.0837554	0.0912983	0.016254	0.0222662	0.0549701	0.263937	0.528714	0.0679307	0.0185538	0.0130723	0.30444	0.646801	0.111273	0.217278	0.0866666	0.931568	0.0982389
core_cave3 rind_cave3 p.ttest	1.24e-05	0.00379967	0.998957	7.76e-07	0.00620271	0.0321047	0.017346	0.0444525	0.0212588	0.411254	0.0169475	0.0123518	0.00503393	0.0549701	0.0728228	0.834772	0.142328	0.00195	0.417426	3.45e-07	0.880781	1.31e-05	0.388551	0.0049803	0.0866346	0.0982389
	213.495	109.243	78.3146	52.3688	34.2245	25.3661	19.0724	14.5177

## Sheet: fungi_caves
	Sum 5 genera	Penicillium	Geotrichum	Debaryomyces	Kluyveromyces	Scheffersomyces	Pichia	Sugiyamaella	Diutina	Candida	Clavispora	Tetrapisispora	Fusarium
Cave_1_core	98.0528	17.1105	77.503	0.0695061	3.36977	0	0.527286	0.355448	0.108403	0.0960528	0.318768	0.257549	0.0265467
Cave_1_rind	97.1704	54.3393	0.0756125	40.9335	0.171625	1.65041	0.151225	0.486824	0.622333	0.531005	0.0756125	0.0756125	0.118075
Cave_2_core	98.4282	29.0486	66.8429	0.168307	2.36842	0	0.366235	0.308615	0.122344	0.108297	0.230641	0.222104	0.0358334
Cave_2_rind	99.5781	96.4966	0	2.65963	0.32511	0.0967077	0	0.0217723	0.0689124	0.122076	0	0	0.0217723
Cave_3_core	97.4391	11.9945	78.4216	0.182349	6.84064	0	0.696531	0.321642	0.454952	0.116152	0.401324	0.258738	0.0796822
Cave_3_rind	99.6224	92.8775	0.0093214	6.03984	0.460323	0.235438	0.0279668	0.00932401	0.0186454	0.255226	0.0186454	0	0.0186454
Kruskal p-value		0.0201129	0.0109134	0.0150637	0.0138881	0.0133394	0.00781213	0.0229974	0.0141049	0.121826	0.00708017	0.0133729	0.354981
core_cave1 core_cave2 p.ttest		0.536349	0.471952	0.998947	0.537905	1	0.0662001	0.760592	0.929915	0.96133	0.0447058	0.541071	0.952434
core_cave2 core_cave3 p.ttest		0.377523	0.461616	0.998947	0.0125889	1	0.00143602	0.89113	0.099961	0.96133	0.000899688	0.541071	0.768282
core_cave1 core_cave3 p.ttest		0.805565	0.99933	0.998947	0.0456219	1	0.0593658	0.820165	0.097257	0.96133	0.0540464	1	0.687976
rind_cave1 rind_cave2 p.ttest		0.0385546	0.99933	0.0119837	0.91407	0.0207633	0.0770679	0.00160224	0.0275117	0.0191296	0.0700736	0.186272	0.499461
rind_cave2 rind_cave3 p.ttest		0.822823	0.99933	0.998947	0.91407	1	0.715822	0.89113	0.860862	0.479322	0.619065	1	0.952434
rind_cave1 rind_cave3 p.ttest		0.0522037	0.99933	0.0174163	0.91407	0.0290396	0.135354	0.00160224	0.0275117	0.119549	0.155257	0.186272	0.499461
core_cave1 rind_cave1 p.ttest		0.054639	3.02e-05	0.0103688	0.0573621	0.0188003	0.000757287	0.226128	0.0275117	0.0191296	5.85e-05	0.00441973	0.499461
core_cave2 rind_cave2 p.ttest		0.00329122	8.34e-05	0.998947	0.182564	1	0.000809046	0.0137493	0.860862	0.96133	8.3e-05	0.00131605	0.952434
core_cave3 rind_cave3 p.ttest		0.0014949	3.02e-05	0.998947	0.00110916	1	9.19e-06	0.0121278	0.0471583	0.479322	1.62e-06	0.000567913	0.687976

## Sheet: amines_caves
	Agmatine	Histamine	Tyramine	Putrescine	Tryptamine	Cadaverine	Phenylethylamine	Total Amines
Cave_1_core	0	133.01	2157.37	181.297	441.13	1566.76	7.27	4486.83
Cave_1_rind	143.21	96.33	2441.79	133.99	764.233	1434.27	0	5013.81
Cave_2_core	355.86	615.77	4138.69	40.55	1297.75	758.86	130.473	7337.95
Cave_2_rind	425.297	474.61	2721.17	47.3067	563.427	610.697	83.61	4926.12
Cave_3_core	425.29	137.823	1092.86	132.223	241.927	938.35	0	2968.48
Cave_3_rind	568.507	92.6267	1170.6	93.73	1145.01	1108.65	0	4179.12
Kruskal p-value	0.00653454	0.0110322	0.0136251	0.00715793	0.0530276	0.0138881	0.00465572	0.0530276
core_cave1 core_cave2 p.ttest	2.54e-05	1.29e-12	0.00869881	6.86e-06	0.0618659	0.00771378	4.71e-18	0.0534286
core_cave2 core_cave3 p.ttest	0.187788	1.29e-12	0.000464416	0.000155207	0.0523698	0.469955	3.16e-18	0.00875379
core_cave1 core_cave3 p.ttest	5.09e-06	0.796341	0.0785677	0.00953602	0.585195	0.0242621	0.000145395	0.251032
rind_cave1 rind_cave2 p.ttest	0.00016718	1.37e-11	0.624077	0.000173859	0.585195	0.00771378	2.79e-16	0.927558
rind_cave2 rind_cave3 p.ttest	0.0145853	1.37e-11	0.0214954	0.0109165	0.172842	0.0597394	2.79e-16	0.6059
rind_cave1 rind_cave3 p.ttest	5.09e-06	0.800847	0.0408476	0.0218862	0.359596	0.172538	1	0.591256
core_cave1 rind_cave1 p.ttest	0.0145853	0.0291419	0.624077	0.0107349	0.397487	0.516719	0.000145395	0.733894
core_cave2 rind_cave2 p.ttest	0.187788	7.18e-07	0.0303757	0.698939	0.0977095	0.5029	2.18e-13	0.0899723
core_cave3 rind_cave3 p.ttest	0.0145853	0.0126183	0.877692	0.0252599	0.0618659	0.469955	1	0.373506

## Sheet: volatiles_caves
	2-Propanol	2-Butanone	Acetic acid	3-Methyl butanal	2-Pentanone	Methyl butanoate	Acetoin	Propanoic acid	Toluene	Ethyl butanoate	2-Hexanone	2-Methyl propanoic acid	Butanoic acid	Isopentyl acetate	3-Methyl butanoic acid	Propyl butanoate	2-Methyl butanoic acid	2-Heptanone	2-Heptanol	Methyl hexanoate	Pentanoic acid	Ethyl hexanoate	2-Octanone	Trimethylpyrazine	2-Pentylbutyrate	Hexanoic acid	8-Nonen-2-one	2-Nonanone	2-Nonanol	Methyl octanoate	Hexalactone	Ethyl octanoate	Octanoic acid	Isopropyl octanoate	Isoamyll hexanoate	2-Undecanone	Methyl decanoate	Ethyl decanoate	Decanoic acid	Isopentyl octanoate	Isobutyl decanoate	Ethyl dodecanoate
Cave_1_core	961950	0	1.52064e+06	89873.2	1311387	99424.5	0	802455	121602	1.45825e+07	0	349780	6.47458e+06	0	1896082	3855585	1.45179e+06	9.97942e+06	840660	571741	472593	2.18078e+07	207298	63683.5	655998	8.64717e+06	0	4.32284e+06	44359	160215	174953	5361163	3.16022e+06	18238	290575	393812	32334	1.31605e+06	158773	47667.3	34905.2	60045.5
Cave_1_rind	0	0	2.62941e+06	30150.3	1873335	0	0	437521	127134	1.47044e+07	0	388933	5.33285e+06	0	2.00626e+06	2.11841e+06	1.68626e+06	1.39403e+07	2.17535e+06	290025	304546	2.43049e+07	770893	192955	990525	8.19642e+06	0	1.71014e+07	850271	153019	269366	1.19891e+07	3.99489e+06	31585.5	717968	2.77251e+06	53912.8	3.64103e+06	701236	132326	54939.2	210819
Cave_2_core	195215	0	1.79373e+06	70072.8	1.41428e+06	140121	0	729235	180375	10399075	18420.8	194836	6.5185e+06	0	2.14382e+06	1.58548e+06	1.17102e+06	9.39043e+06	840562	890885	405887	21890922	216248	40744.7	526695	8.59247e+06	0	4852129	156862	233475	168622	5.03474e+06	2.96405e+06	20793.2	350064	362237	46606.7	1.07699e+06	114851	47952.2	19426.8	47827.5
Cave_2_rind	0	0	3336922	0	1.83136e+06	18285.5	283592	386447	99831	7.72116e+06	0	313862	5.72159e+06	0	3649452	901112	1.97841e+06	1.08808e+07	1.52021e+06	243142	414486	2.00351e+07	392329	122496	594628	8.78164e+06	0	1.46642e+07	581683	96177.8	236431	5.7146e+06	3.34656e+06	37114.5	533678	2.12121e+06	41169.2	1774009	511461	97508.7	23898.7	124960
Cave_3_core	0	0	1.95886e+06	146337	3.99559e+06	151474	0	396492	107609	7778743	238970	263922	6.5366e+06	0	2.49348e+06	988708	1490154	1.66815e+07	2.03638e+06	862684	503497	1.2816e+07	423742	65320	754935	8.85853e+06	0	7179084	91715.8	225553	239638	2.50893e+06	3.59845e+06	22184	343062	403078	45904.5	788774	229160	53192.3	13758.7	40744.2
Cave_3_rind	0	0	4.59314e+06	78698.7	3.2437e+06	63439.8	0	350076	280166	6.83556e+06	198918	486930	7018058	0	4.24658e+06	819044	2.73559e+06	15843427	1.61527e+06	438013	566170	1.58378e+07	649710	107308	686556	9.71255e+06	0	14609503	715406	145388	302313	4273877	4.50793e+06	27185.7	938582	1.84122e+06	45879.8	1.28922e+06	880364	152520	21296	77670.3
Kruskal p-value	0.0260559	NaN	0.0104124	0.00941091	0.0107179	0.0113509	0.00482615	0.0242716	0.0718294	0.00866479	0.00766202	0.0259131	0.0375299	NaN	0.0104124	0.0127419	0.0100182	0.0140214	0.0559684	0.0102135	0.160475	0.00900725	0.00892042	0.007787	0.0612127	0.0329905	NaN	0.0104124	0.0168931	0.0274044	0.0184735	0.0174529	0.065736	0.0841407	0.0106152	0.014156	0.153994	0.0123806	0.0144289	0.0158715	0.0306367	0.0074172
core_cave1 core_cave2 p.ttest	0.154865	NaN	0.555903	0.204502	0.907973	0.136997	1	0.480872	0.525245	0.000310686	0.29073	0.0565496	0.951444	NaN	0.406179	0.00242614	0.182997	0.597394	0.999802	0.0176857	0.546685	0.921771	0.896224	0.142119	0.332007	0.813155	NaN	0.815903	0.449534	0.0837541	0.887437	0.696336	0.597929	0.748932	0.421712	0.975641	0.257237	0.37323	0.685504	0.985468	0.114326	0.45242
core_cave2 core_cave3 p.ttest	0.987133	NaN	0.694823	0.000394842	0.00260182	0.638437	1	0.00108605	0.400153	0.00760947	1.4e-08	0.312121	0.953703	NaN	0.24599	0.34512	0.15443	0.000322042	0.0350627	0.789722	0.419097	7.38e-07	0.0140793	0.126237	0.084028	0.39403	NaN	0.227627	0.658524	0.822184	0.0785397	0.0174408	0.168671	0.832928	0.913672	0.975641	0.985225	0.297728	0.347775	0.790889	0.559885	0.63868
core_cave1 core_cave3 p.ttest	0.0709298	NaN	0.354419	0.00250693	0.00260182	0.0709052	1	0.000462031	0.914187	3.72e-06	7.43e-09	0.237906	0.951444	NaN	0.0567079	0.000445816	0.835537	0.000338891	0.0350627	0.0260892	0.751053	7.38e-07	0.0122154	0.907788	0.478467	0.503045	NaN	0.179492	0.71366	0.105854	0.0785397	0.0095066	0.340185	0.637122	0.453035	0.975641	0.257237	0.0794178	0.555689	0.790889	0.0380167	0.267335
rind_cave1 rind_cave2 p.ttest	1	NaN	0.150991	0.0620427	0.937407	0.484844	5.11e-12	0.654622	0.892085	3.72e-06	1	0.290803	0.283841	NaN	8.23e-05	0.0656889	0.180106	0.0258598	0.193585	0.705425	0.419097	0.000451011	0.000329548	0.000661825	0.00991513	0.0511648	NaN	0.222877	0.0816717	0.141984	0.338992	1.7e-05	0.168671	0.612318	0.0165648	0.0666617	0.257237	1.07e-05	0.133932	0.0575259	0.00389278	0.000237459
rind_cave2 rind_cave3 p.ttest	1	NaN	0.0186501	0.000372999	0.0415061	0.108142	5.11e-12	0.660142	0.0457637	0.319705	2.59e-08	0.0392227	0.0081587	NaN	0.0567079	0.871614	0.00314637	0.00160579	0.867918	0.114503	0.23253	0.000463583	0.00512209	0.314764	0.481491	0.005404	NaN	0.974927	0.386959	0.193877	0.0785397	0.154583	0.027531	0.357517	0.000101817	0.455911	0.627599	0.088163	0.00844394	0.00793135	0.776693	0.0123498
rind_cave1 rind_cave3 p.ttest	1	NaN	0.00168388	0.00639436	0.0421169	0.0325539	1	0.39934	0.045966	2.8e-06	2.59e-08	0.186435	0.001982	NaN	1.11e-05	0.0565851	0.00031582	0.143301	0.259975	0.222447	0.0900081	1.07e-06	0.111229	0.000174284	0.0289266	0.000330831	NaN	0.222877	0.386959	0.822184	0.338992	4.94e-06	0.269415	0.635228	0.00746634	0.0129537	0.49163	1.32e-06	0.145467	0.264941	0.00276926	3.88e-06
core_cave1 rind_cave1 p.ttest	0.0709298	NaN	0.0322684	0.00185462	0.456162	0.00355546	1	0.000706346	0.916969	0.940739	1	0.541189	0.00847743	NaN	0.674371	0.0132734	0.252782	0.00625652	0.0350627	0.0277016	0.23253	0.0147441	2.04e-05	4.24e-06	0.021296	0.130772	NaN	8.31e-05	0.000453057	0.822184	0.0234955	1.21e-05	0.0798425	0.227993	7.59e-05	1.95e-05	0.121008	1.32e-06	0.000753707	0.000402947	0.0421617	1.37e-06
core_cave2 rind_cave2 p.ttest	0.987133	NaN	0.00685374	0.000684169	0.508873	0.000869426	5.11e-12	0.000994437	0.367746	0.00730036	0.29073	0.110984	0.0488667	NaN	0.000159135	0.290588	0.00231427	0.243663	0.193585	0.000417055	0.914661	0.0517917	0.0279275	0.000214382	0.564177	0.524633	NaN	0.00020454	0.00927114	0.0104657	0.0785397	0.486109	0.359891	0.19583	0.0165648	0.000218226	0.627599	0.0236174	0.00597134	0.011907	0.631724	0.000441284
core_cave3 rind_cave3 p.ttest	1	NaN	0.000167284	0.000788009	0.294016	0.0070793	1	0.654622	0.0457637	0.310737	0.030244	0.0156889	0.192037	NaN	5.3e-05	0.852422	8.39e-05	0.487613	0.372192	0.0036391	0.546685	0.00503143	0.010568	0.0141363	0.564177	0.00798091	NaN	0.00155015	0.00101143	0.0751301	0.0785397	0.0859351	0.0642474	0.617959	3.88e-06	0.000676348	0.997168	0.0868795	0.000246516	0.000150029	0.432771	0.041022
