# Supplementary figures and images for: Environmental sources along natural cave ripening shape the microbiome and metabolome of artisanal blue-veined cheeses
Source: Research Square preprint supplement (doi:10.21203/rs.3.rs-1150288/v2), 2022-08-11

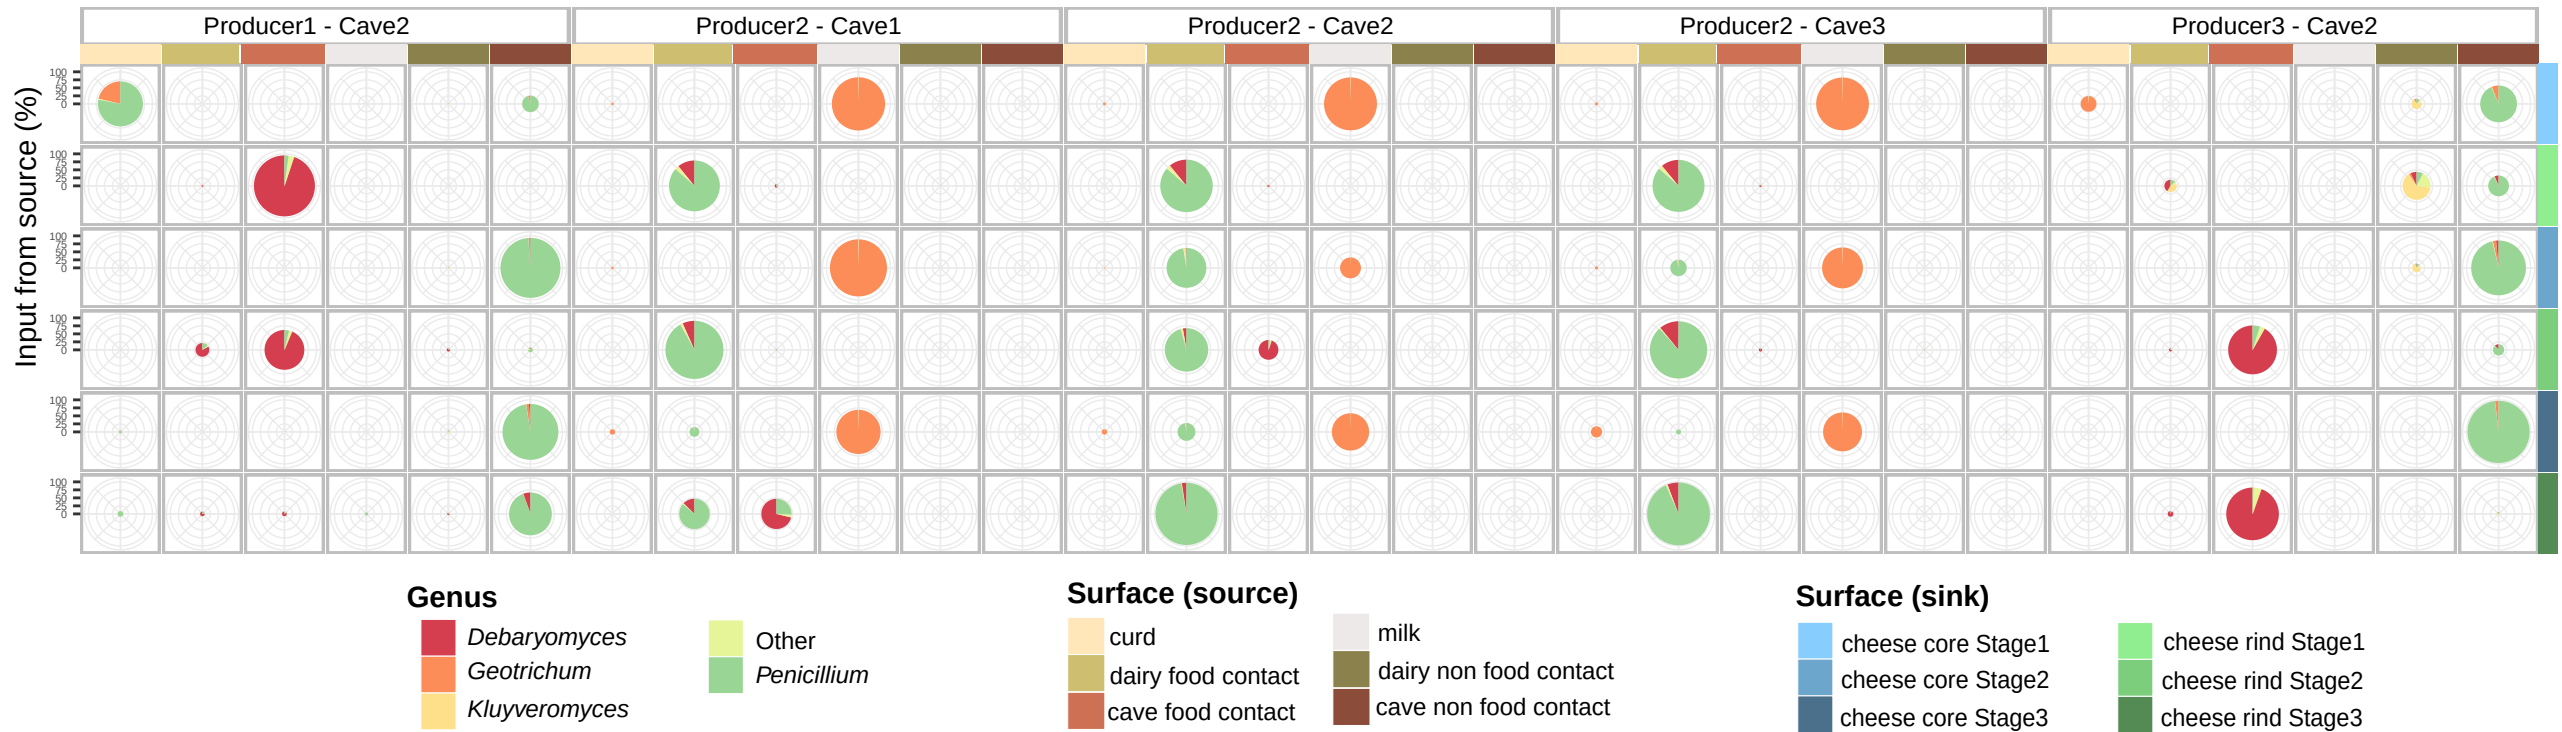

Supplement: Supplementary file 2 [file fbc5abb965f7f097023810ba.pdf]
